# Supplementary material
Source: PubMed Central journal article supplement (PMC3236123)
Supplement: supp_blood-2011-04-350082_Document1.pdf [file supp_blood-2011-04-350082_Document1.pdf]

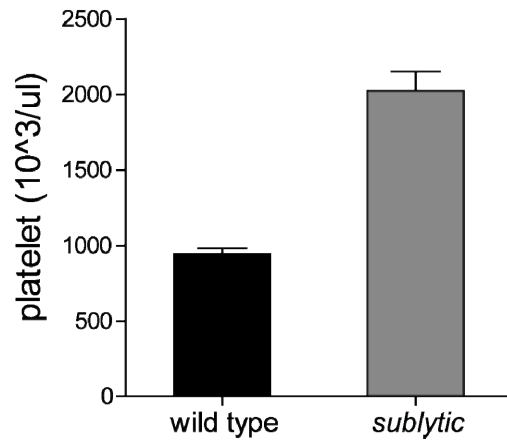

**Figure S1. Platelet counts was elevated concomitant with reticulocytosis observed in *sublytic* mouse**

Both male and female mice at 5 weeks of age were used for CBC analysis. N=9 for both wild type and *sublytic* mice.

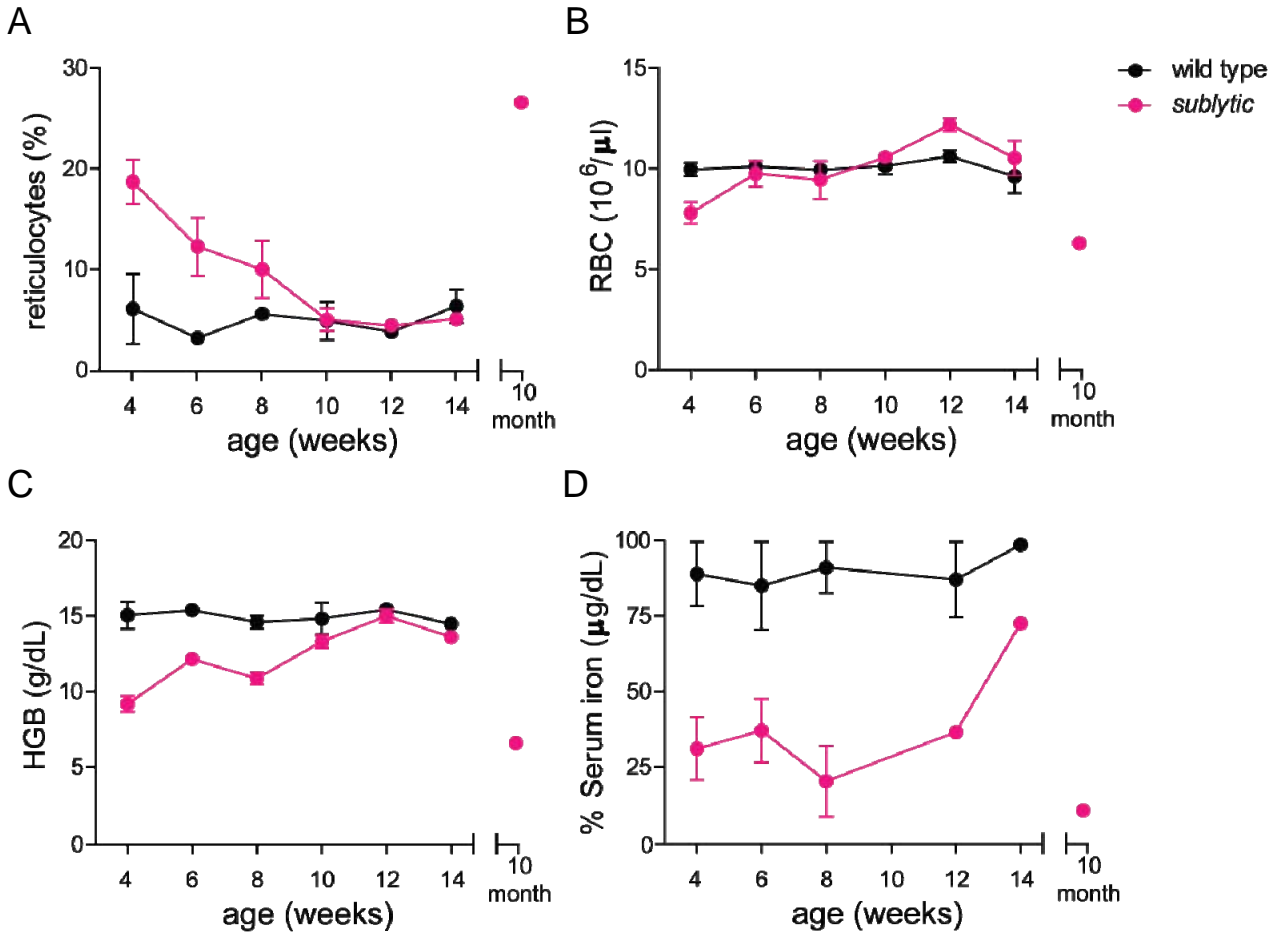

**Figure S2. The over-time changes of hematological and serum iron values in *sublytic* mice**

This data was generated by combining results from three separate groups of *sublytic* homozygotes (n=2 to 3) and corresponding wild type littermates (n= 2 to 3). In each group, mice were bled once every 4 weeks and subjected to complete blood count and serum iron measurement. The data for one 10-month-old *sublytic* homozygote, which developed a second round of severe anemia is also shown. Data represent mean  $\pm$  SD.

*sublytic* bone marrow → WT recipients

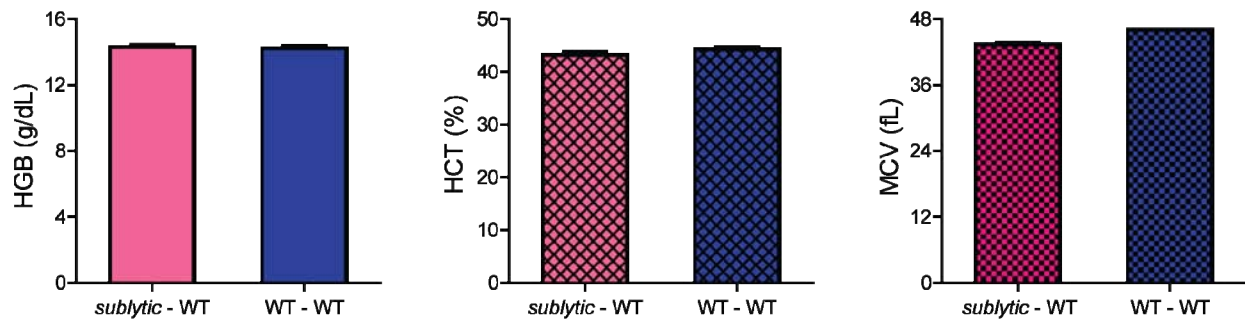

wild - type bone marrow → *sublytic* recipients

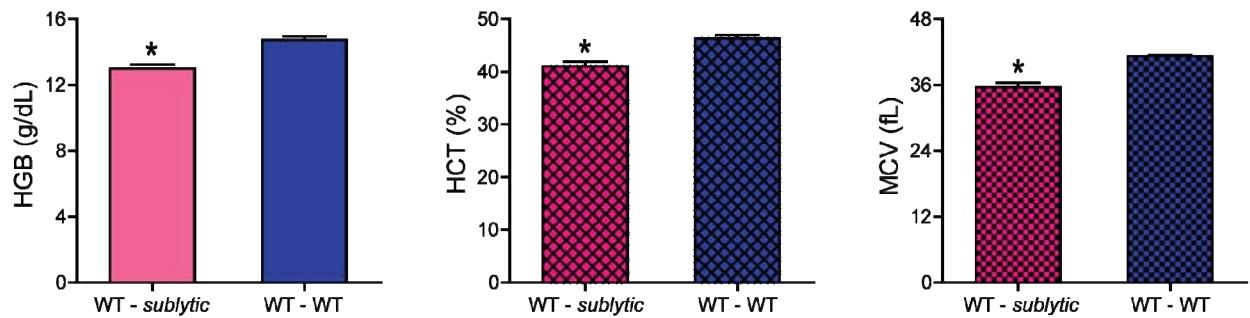

**Figure S3. The *sublytic* phenotype is conferred by the non-hematopoietic compartment**  
When homozygous *sublytic* marrow was transferred into lethally irradiated wild type recipient mice (n=5), the reconstituted chimeric mice were all normal in RBC indices; on the contrary, when transferring wild type marrow into lethally irradiated homozygous *sublytic* recipients (n=5), the reconstituted chimeric mice all developed microcytic anemia. Similarly reduced hemoglobin, hematocrit and MCV value were observed in wild type marrow-reconstituted *sublytic* mice and non-chimeric *sublytic* mice. Error bars represent SEM.

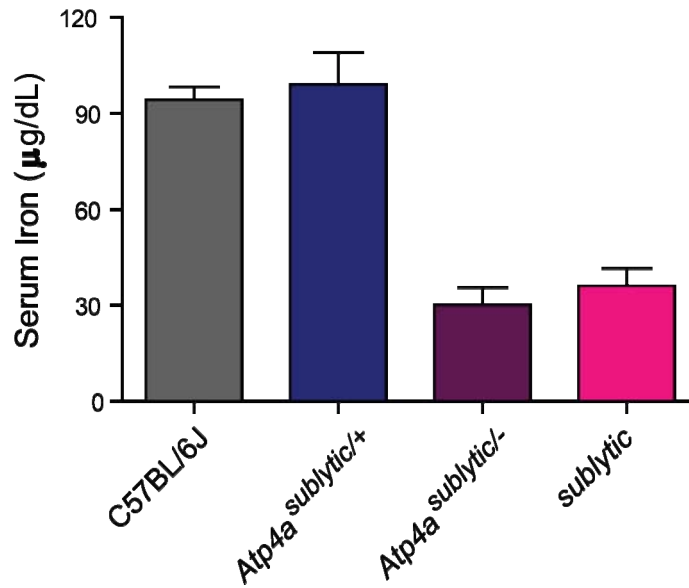

**Figure S4. *Atp4a*<sup>sublytic/-</sup> mice showed decreased serum iron levels**

Serum iron concentration was measured in *Atp4a*<sup>sublytic/-</sup> (n=5) and *Atp4a*<sup>sublytic/+</sup> littermates (n=2) at 9 weeks of age, along with age-matched C57BL/6J wild type mice (n=3) and *sublytic* homozygotes (n=2).  $P=0.0571$ , C57BL/6J vs. *Atp4a*<sup>sublytic/-</sup>, Student's *t* test.

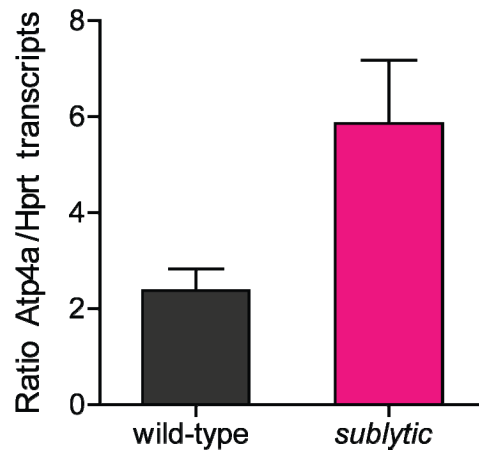

**Figure S5. *Atp4a* transcript level was elevated in *sublytic* mice**

Total RNA was isolated from stomach tissue of wild type and *sublytic* mice and subjected to first-strand cDNA synthesis. The transcript level of *Atp4a* was then surveyed by quantitative PCR with *Hprt* as endogenous control for gene expression. N=3 for both wild type and *sublytic* mice.

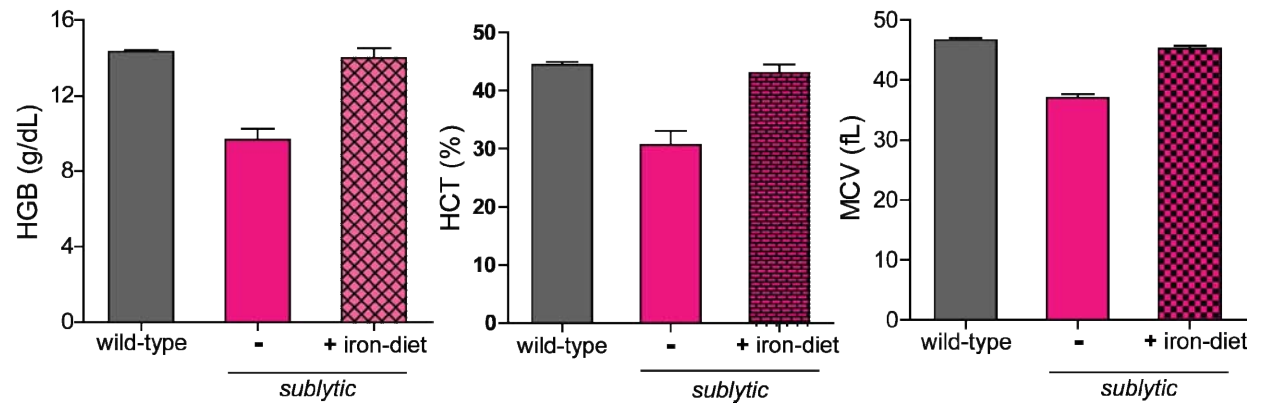

**Figure S6. Anemia can be rescued by iron repletion in *sublytic* mice**

Mice were fed with a high-iron diet (regular rodent diet supplemented with 2% carbonyl iron) for one month, and then red cell indices were evaluated. N=4 *sublytic* mice.

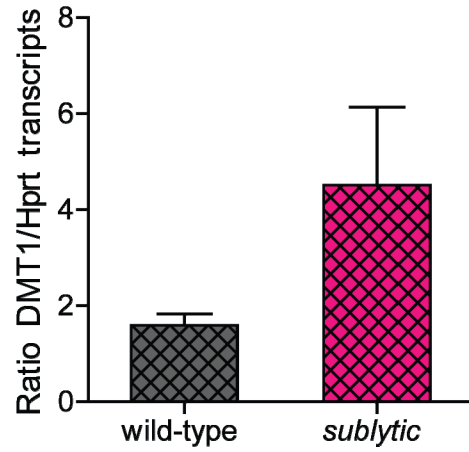

**Figure S7. *DMT1* transcript was upregulated in *sublytic* mice**

Total RNA was isolated from duodenum tissue of wild type and *sublytic* mice and subjected to first-strand cDNA synthesis. The transcript level of *DMT1* was then evaluated by quantitative PCR with *Hprt* as endogenous control for gene expression. N=3 for both wild type and *sublytic* mice.

| Mouse ID                      | RBC (M/ml) | HGB (g/dL) | MCV (fL) | MCH (pg) | RDW (%) | Serum Iron (µg/dL) |
|-------------------------------|------------|------------|----------|----------|---------|--------------------|
| <i>On regular diet</i>        |            |            |          |          |         |                    |
| dtF1                          | 8.21       | 12.8       | 48.0     | 15.6     | 18.0    | 205                |
| dtF2                          | 8.33       | 13.2       | 49.0     | 15.9     | 17.3    | 176                |
| dtM1                          | 8.02       | 12.6       | 49.0     | 15.7     | 17.7    | 80                 |
| dtM2                          | 8.23       | 12.3       | 47.0     | 15.0     | 19.0    | 143                |
| <i>on iron-deficient diet</i> |            |            |          |          |         |                    |
| dtF1                          | 9.08       | 10.8       | 38.0     | 11.9     | 16.6    | 41                 |
| dtF2                          | 9.74       | 11.0       | 34.0     | 11.3     | 14.5    | 40                 |
| dtM1                          | 10.51      | 12.3       | 36.0     | 11.7     | 17.3    | 14                 |
| dtM2                          | 6.14       | 8.4        | 38.0     | 13.6     | 14.7    | 27                 |

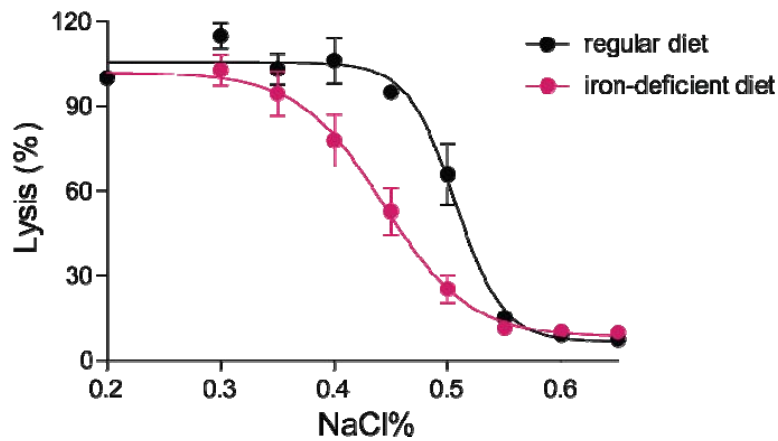

**Figure S8. Microcytic red blood cells show reduced osmotic fragility**

Wild type C57BL/6J mice were maintained on an iron deficient diet from 5 weeks of age for 40 days and rendered iron deficient and developed hypochromic microcytic anemia. Red blood cells were then isolated and subjected to lysis with hypotonic solution.
